# Supplementary material for: Responsiveness to endurance training can be partly explained by the number of favorable single nucleotide polymorphisms an individual possesses
Source: PubMed Central journal article supplement (PMC10358902; doi:10.1371/journal.pone.0288996), 2023-07-20
Supplement: pone.0288996.s003.pdf [file pone.0288996.s003.pdf]

**S3. Participant data.** Individual data collected for each participant.

| Participant no. | Group | Height (m) | Body Mass (kg) | BMI (kg/m <sup>2</sup> ) | Baseline Cooper run (km) | Week 4 Cooper run (km) | Post Cooper run (km) | ΔCooper run pre vs post (%) | Total training load (A.U.) |
|-----------------|-------|------------|----------------|--------------------------|--------------------------|------------------------|----------------------|-----------------------------|----------------------------|
| 1               | EG    | 1.83       | 74.0           | 22.1                     | 2.45                     | 2.17                   | 2.26                 | -7.76                       | 43860.0                    |
| 2               | EG    | 1.85       | 90.3           | 26.4                     | 2.07                     | 2.44                   | 2.54                 | 22.71                       | 46510.0                    |
| 3               | EG    | 1.68       | 59.0           | 21.0                     | 1.76                     | 1.98                   | 2.09                 | 18.75                       | 43860.0                    |
| 4               | EG    | 2.04       | 108.0          | 26.0                     | 2.33                     | 2.61                   | 2.63                 | 12.88                       | 47705.0                    |
| 5               | EG    | 1.80       | 89.0           | 27.5                     | 2.17                     | 2.30                   | 2.41                 | 11.11                       | 52985.0                    |
| 6               | EG    | 1.65       | 166.0          | 61.3                     | 1.61                     | 1.88                   | 1.93                 | 20.00                       | 43860.0                    |
| 7               | EG    | 1.75       | 69.0           | 22.5                     | 2.54                     | 2.67                   | 2.71                 | 6.69                        | 46897.5                    |
| 8               | EG    | 1.85       | 105.0          | 30.7                     | 2.24                     | 1.96                   | 2.09                 | -6.47                       | 43860.0                    |
| 9               | EG    | 1.78       | 89.0           | 28.1                     | 1.40                     | 1.64                   | 1.71                 | 22.14                       | 43860.0                    |
| 10              | EG    | 1.80       | 84.8           | 26.2                     | 2.31                     | 2.43                   | 2.42                 | 4.76                        | 43860.0                    |
| 11              | EG    | 1.80       | 89.0           | 27.5                     | 2.43                     | 2.51                   | 2.59                 | 6.62                        | 66215.1                    |
| 12              | EG    | 1.75       | 61.2           | 20.0                     | 1.55                     | 1.61                   | 1.63                 | 5.16                        | 43860.0                    |
| 13              | EG    | 1.73       | 57.0           | 19.0                     | 3.42                     | 3.59                   | 3.64                 | 6.43                        | 64267.5                    |
| 14              | EG    | 1.79       | 97.5           | 30.6                     | 2.66                     | 2.43                   | 2.97                 | 11.65                       | 43860.0                    |
| 15              | EG    | 1.80       | 76.5           | 23.6                     | 1.88                     | 2.21                   | 2.28                 | 21.28                       | 43860.0                    |
| 16              | EG    | 1.69       | 60.7           | 21.3                     | 1.85                     | 2.20                   | 2.24                 | 20.87                       | 43860.0                    |
| 17              | EG    | 1.88       | 91.2           | 25.8                     | 2.41                     | 2.57                   | 2.64                 | 9.33                        | 53660.0                    |
| 18              | EG    | 1.81       | 107.5          | 32.8                     | 2.20                     | 2.35                   | 2.39                 | 8.64                        | 43860.0                    |
| 19              | EG    | 1.73       | 74.9           | 25.0                     | 2.88                     | 3.01                   | 3.15                 | 9.50                        | 73435.0                    |
| 20              | EG    | 1.70       | 75.0           | 25.9                     | 1.80                     | 2.12                   | 2.29                 | 26.79                       | 43860.0                    |
| 21              | EG    | 1.84       | 73.0           | 21.5                     | 2.59                     | 2.82                   | 2.86                 | 10.56                       | 43860.0                    |
| 22              | CG    | 1.65       | 63.0           | 23.1                     | 1.95                     | 1.98                   | 1.93                 | -0.83                       | 5250.0                     |
| 23              | CG    | 1.73       | 75.0           | 25.1                     | 2.25                     | 2.32                   | 2.17                 | -3.56                       | 8150.0                     |
| 24              | CG    | 1.68       | 75.0           | 26.6                     | 1.63                     | 1.43                   | 1.60                 | -1.84                       | 5400.0                     |
| 25              | CG    | 1.65       | 54.0           | 19.8                     | 1.69                     | 1.72                   | 1.61                 | -4.76                       | 14655.0                    |
| 26              | CG    | 1.63       | 54.0           | 20.4                     | 2.05                     | 1.99                   | 2.05                 | 0.00                        | 24360.0                    |
| 26              | CG    | 1.70       | 80.4           | 27.8                     | 1.87                     | 1.85                   | 1.89                 | 1.07                        | 3829.5                     |
| 28              | CG    | 1.87       | 71.0           | 20.3                     | 1.98                     | 2.29                   | 2.43                 | 22.76                       | 9300.0                     |
| 29              | CG    | 1.65       | 88.2           | 32.4                     | 1.91                     | 2.02                   | 2.04                 | 6.81                        | 18820.0                    |
| 30              | CG    | 1.65       | 61.6           | 22.6                     | 1.30                     | 1.30                   | 1.38                 | 6.15                        | 19850.0                    |
| 31              | CG    | 1.64       | 54.0           | 20.1                     | 2.22                     | 2.30                   | 2.20                 | -0.90                       | 30588.0                    |
| 32              | CG    | 1.73       | 101.3          | 33.8                     | 2.30                     | 2.24                   | 2.27                 | -1.30                       | 44656.0                    |
| 33              | CG    | 1.85       | 69.0           | 20.2                     | 2.65                     | 2.94                   | 2.94                 | 10.94                       | 36000.0                    |
| 34              | CG    | 1.63       | 51.0           | 19.3                     | 2.54                     | 2.61                   | 2.65                 | 4.33                        | 30480.0                    |
| 35              | CG    | 1.85       | 88.0           | 25.7                     | 2.70                     | 2.75                   | 2.82                 | 4.17                        | 104085.0                   |
| 36              | CG    | 1.73       | 75.3           | 25.2                     | 2.63                     | 2.41                   | 2.44                 | -7.22                       | 7014.4                     |
| 37              | CG    | 1.67       | 68.0           | 24.4                     | 1.90                     | 1.98                   | 1.87                 | -1.69                       | 13900.0                    |
| 38              | CG    | 1.82       | 105.0          | 31.7                     | 2.42                     | 2.51                   | 2.05                 | -14.74                      | 18280.0                    |
| 39              | CG    | 1.77       | 76.0           | 24.3                     | 1.51                     | 1.55                   | 1.48                 | -1.94                       | 12210.0                    |
| 40              | CG    | 1.88       | 98.7           | 27.9                     | 2.00                     | 2.00                   | 2.09                 | 4.83                        | 19200.0                    |
| 41              | CG    | 1.62       | 68.3           | 26.0                     | 1.90                     | 1.92                   | 1.96                 | 3.13                        | 21880.0                    |
| 42              | CG    | 1.66       | 63.0           | 22.9                     | 2.10                     | 2.37                   | 2.21                 | 4.64                        | 16600.0                    |
| 43              | CG    | 1.66       | 62.5           | 22.6                     | 2.28                     | 2.14                   | 2.31                 | 1.40                        | 23675.0                    |
| 44              | CG    | 1.75       | 74.8           | 24.4                     | 1.67                     | 1.68                   | 1.74                 | 4.17                        | 18130.0                    |
| 45              | CG    | 1.76       | 82.5           | 26.6                     | 1.88                     | 2.06                   | 1.92                 | 1.56                        | 36882.7                    |
